# Supplementary material
Source: PubMed Central journal article supplement (PMC4241138)
Supplement: NIHMS634975-supplement-2.pdf [file NIHMS634975-supplement-2.pdf]

# Supplementary Mathematical Note

The mathematical framework of doubly stochastic point processes informs our interpretation of spike-count autocorrelation. Here we present calculations for the variability and autocorrelation for an inhomogeneous Poisson process with stochastic rate. We consider how rate fluctuations at different timescales affects the spike-count autocorrelation. Analysis of multiple timescales results in the functional form used to fit the autocorrelation data (Eq. S.20).

## Definitions

We consider a point process that generates a sequence of events at particular times. The count in a given time window  $(t, t + \Delta)$  is denoted  $N(t, \Delta)$ . For a homogeneous Poisson process, the event rate  $\lambda(t)$  is given by a constant  $\mu$ , and the mean and variance of the count are both equal to  $\mu\Delta$ . For an inhomogeneous Poisson process, the rate  $\lambda(t)$  changes in time. In this case, the mean and variance are also equal, but calculated by the integral of the event rate:

$$\langle N(t, \Delta) \rangle = \int_t^{t+\Delta} ds \lambda(s), \text{ and} \quad (\text{S.1})$$

$$\langle N(t, \Delta)^2 \rangle - \langle N(t, \Delta) \rangle^2 = \int_t^{t+\Delta} ds \lambda(s) \quad (\text{S.2})$$

If  $\lambda(t) = \mu$ , this is the homogeneous Poisson process.

Here we are interested the case of a doubly stochastic process, in which the time-dependent rate  $\lambda(t)$  is itself a stochastic process, characterized by a mean and variance. For simplicity, we assume the mean and variance of the event rate are constant in time, i.e.  $\langle \lambda(t) \rangle = \mu$  and  $\langle \lambda(t)^2 \rangle - \langle \lambda(t) \rangle^2 = \sigma^2$ . Total variability is due both to variability in event timing and variability in event rate.

## Mean and variance

Averaging over both sources of stochasticity, the total mean of the count is equal to:

$$\langle \langle N(t, \Delta) \rangle \rangle = \int_t^{t+\Delta} ds \langle \lambda(s) \rangle = \mu\Delta \quad (\text{S.3})$$

The mean count is equal to that of a Poisson process with constant rate  $\mu$ . The variance of counts will differ from that of a Poisson process, to reflect the contribution of rate variability. The second

moment of the count is given by:

$$\langle\langle N(t, \Delta)^2 \rangle\rangle = \left\langle \int_t^{t+\Delta} ds \lambda(s) + \left[ \int_t^{t+\Delta} ds \langle \lambda(s) \rangle \right]^2 \right\rangle = \mu\Delta + \int_t^{t+\Delta} ds \int_t^{t+\Delta} ds' \langle \lambda(s) \lambda(s') \rangle \quad (\text{S.4})$$

We denote  $\delta\lambda(t) \equiv \lambda(t) - \mu$ , the deviation of the rate from its mean. The total variance is then given by:

$$\langle\langle N(t, \Delta)^2 \rangle\rangle - \langle\langle N(t, \Delta) \rangle\rangle^2 = \mu\Delta + \int_t^{t+\Delta} ds \int_t^{t+\Delta} ds' \langle \delta\lambda(s) \delta\lambda(s') \rangle \quad (\text{S.5})$$

Here we consider that the event rate is characterized by a given time constant  $\tau$ . We define the autocovariance of the rate to be:

$$\langle \delta\lambda(s) \delta\lambda(s') \rangle = \sigma^2 \exp\left(-\frac{|s-s'|}{\tau}\right) \quad (\text{S.6})$$

For instance, an Orstein-Uhlenbeck process has this form of an autocovariance. Note that the linear rate model, shown in Fig. 4a and described in the Methods, behaves as an Ornstein-Uhlenbeck process in response to white-noise input and produces a rate autocovariance of the form in Eq. S.6. The variance of the count is then given by:

$$\langle\langle N(t, \Delta)^2 \rangle\rangle - \langle\langle N(t, \Delta) \rangle\rangle^2 = \mu\Delta + 2\sigma^2\tau^2 \left[ \exp\left(-\frac{\Delta}{\tau}\right) - \left(1 - \frac{\Delta}{\tau}\right) \right] \quad (\text{S.7})$$

The first term is the contribution of event timing variability and the second term is the contribution of event rate variability. If the time window  $\Delta$  is small relative to  $\tau$  ( $\Delta \ll \tau$ ), the second term is approximately equal to  $\sigma^2\Delta^2$  and independent of  $\tau$ . If the window size  $\Delta$  is large relative to  $\tau$  ( $\Delta \gg \tau$ ), the second term is approximately equal to  $2\sigma^2\tau\Delta$ .

## Autocorrelation

We now examine how rate variability affects correlations in time. We consider covariance between counts in disjoint time bins, each of same window size  $\Delta$ , separated by an integer number of windows  $k$  for a total time lag of  $k\Delta$ . The autocovariance  $C$  at  $k$ -lag is defined as:

$$C(t, t+k\Delta) \equiv \langle\langle N(t, \Delta) N(t+k\Delta, \Delta) \rangle\rangle - \langle\langle N(t, \Delta) \rangle\rangle \langle\langle N(t+k\Delta, \Delta) \rangle\rangle \quad (\text{S.8})$$

The event timings are independent because the intervals are disjoint ( $k \geq 1$ ), so event timing variability does not contribute to autocovariance. The autocovariance is therefore:

$$C(k\Delta) = \int_t^{t+\Delta} ds \int_t^{t+\Delta} ds' \langle \delta\lambda(s)\delta\lambda(s') \rangle = \sigma^2 \left[ 2\tau \sinh\left(\frac{\Delta}{2\tau}\right) \exp\left(-\frac{k\Delta}{\tau}\right) \right]^2 \quad (\text{S.9})$$

When  $k = 0$ , this equation does not apply and autocovariance is simply equal to the variance. In the limit of slow rate fluctuations ( $\Delta \ll \tau$ ):

$$C(k\Delta) \simeq \sigma^2 \Delta^2 \exp\left(-\frac{k\Delta}{\tau}\right) \quad (\text{S.10})$$

In the limit of fast rate fluctuations ( $\Delta \gg \tau$ ):

$$C(k\Delta) \simeq \delta_{1k} \sigma^2 \tau^2 \quad (\text{S.11})$$

where  $\delta_{ij}$  is the Kronecker delta function. For non-contiguous intervals ( $k > 1$ ),  $C \simeq 0$ , and for contiguous intervals ( $k = 1$ ),  $C \simeq \sigma^2 \tau^2$ .

The autocorrelation  $R$  is given by the autocovariance divided by the variance:

$$R(k\Delta) = \left( \frac{\sigma^2 [2\tau \sinh(\frac{\Delta}{2\tau})]^2}{\mu\Delta + 2\sigma^2\tau^2 [\exp(-\frac{\Delta}{\tau}) - (1 - \frac{\Delta}{\tau})]} \right) \exp\left(-\frac{k\Delta}{\tau}\right) \quad (\text{S.12})$$

When  $k = 0$ , this equation does not apply and  $R = 1$  by definition. In the limit of slow rate fluctuations ( $\Delta \ll \tau$ ):

$$R(k\Delta) \simeq \left(1 + \frac{\mu}{\sigma^2\Delta}\right)^{-1} \exp\left(-\frac{k\Delta}{\tau}\right) \quad (\text{S.13})$$

If rate fluctuations are large ( $\sigma^2\Delta/\mu \gg 1$ ) the first factor is  $\simeq 1$ . If rate fluctuations are small ( $\sigma^2\Delta/\mu \ll 1$ ), this first factor is also small. In the limit of fast rate fluctuations ( $\Delta \gg \tau$ ):

$$R(k\Delta) \simeq \delta_{1k} \left(\frac{\tau}{2\Delta}\right) \left(1 + \frac{\mu}{2\sigma^2\tau}\right)^{-1} \quad (\text{S.14})$$

For non-contiguous intervals ( $k > 1$ ),  $R \simeq 0$ , and for contiguous intervals ( $k = 1$ ),  $R$  remains small.

## Multiple timescales

Now we consider the case where rate fluctuations are governed by multiple timescales  $\{\tau_i\}$ . We define the rate covariance as:

$$\langle \delta\lambda(s)\delta\lambda(s') \rangle = \sum_i \sigma_i^2 \exp\left(-\frac{|s-s'|}{\tau_i}\right) \quad (\text{S.15})$$

Each timescale  $\tau_i$  is weighted by a variance  $\sigma_i^2$ . A given component of the variance  $\sigma_i^2$  can be negative, but the total variance  $\sigma^2 = \sum_i \sigma_i^2$  is positive.

The spike count variance is then given by:

$$\text{Var}(N) = \mu\Delta + \sum_{i=1}^n 2\sigma_i^2\tau_i^2 \left[ \exp\left(-\frac{\Delta}{\tau_i}\right) - \left(1 - \frac{\Delta}{\tau_i}\right) \right] \approx \Delta \left[ \mu + 2 \sum_{i \in S} \sigma_i^2\tau_i + \sum_{i \in L} \sigma_i^2\Delta \right] \quad (\text{S.16})$$

where the sets  $S$  and  $L$  correspond, respectively, to the short and long timescales, namely  $S = \{i : |\tau_i| \ll \Delta\}$  and  $L = \{i : |\tau_i| \gg \Delta\}$ . Unless the absolute variance  $|\sigma_i|^2$  of the short timescales is much larger than that of the long timescales, the contribution of the short timescales can be neglected. The spike-count autocovariance is similarly generalized:

$$C(k\Delta) = \sum_i \sigma_i^2 \left[ 2\tau_i \sinh\left(\frac{\Delta}{2\tau_i}\right) \right]^2 \exp\left(-\frac{k\Delta}{\tau_i}\right) \approx \delta_{k1} \sum_{i \in S} \sigma_i^2\tau_i^2 + \sum_{i \in L} \sigma_i^2\Delta^2 \exp\left(-\frac{k\Delta}{\tau_i}\right) \quad (\text{S.17})$$

Again, short timescales have negligible contribution to autocovariance unless their variance is much larger than the long timescales.

The autocorrelation is obtained by dividing Equation S.17 by Equation S.16:

$$R(k\Delta) \approx \frac{\Delta \sum_{i \in L} \sigma_i^2 \exp\left(-\frac{k\Delta}{\tau_i}\right)}{\mu + \Delta \sum_{i \in L} \sigma_i^2} \quad (\text{S.18})$$

Note that if time constants are very large, and the value of  $k$  is not comparably large, the exponential functions of the corresponding terms are approximately constant. If only one time constant  $\tau_j$  shows an appreciable exponential decay in the range of  $k$  considered, the autocorrelation is approximately equal to (the sums run over the long timescales only):

$$R(k\Delta) \approx \left[ 1 + \frac{\mu}{\sigma_j^2\Delta} + \frac{1}{\Delta} \sum_{i \in S} \tau_i \frac{\sigma_i^2}{\sigma_j^2} + \sum_{i \in L} \frac{\sigma_i^2}{\sigma_j^2} \right]^{-1} \left[ \exp\left(-\frac{k\Delta}{\tau_j}\right) + \sum_{i \in L} \frac{\sigma_i^2}{\sigma_j^2} \right] \quad (\text{S.19})$$

The last term provides an effective “offset” in the autocorrelation that reflects the contributions of long timescales to spike-rate fluctuations. In line with Equation S.19, we fit the experimental spike-count autocorrelation data with the functional form:

$$R(k\Delta) = A \left[ \exp\left(-\frac{k\Delta}{\tau}\right) + B \right] \quad (\text{S.20})$$

These three parameters were used for the fit:  $A$  is the amplitude,  $\tau$  is the intrinsic timescale, and  $B$  is the offset. Equation S.19 supports our interpretation of the autocorrelation offset ( $B$  in Equation S.20) as the relative strength of contributions from long timescales compared to that of the moderate intrinsic timescale.
